# Supplementary material
Source: publisher figshare collection journal article supplement (https://acs.figshare.com/ndownloader/files/31468414)
Supplement: Supplementary file 1 [file 31468414]

	Compound_ID	Smiles	AUC(h*ng/mL)
0	F6446-1111	O=C(Cc1ccc(Cl)cc1)NCC1CCCN(c2nccs2)C1	411
1	F6680-2633	Cn1cc(S(=O)(=O)N2CCN(c3ccnc(C(F)(F)F)c3)C(=O)C2)cn1	11323
2	F2563-1096	COc1cccc(-c2nnc(SCC(=O)NCc3ccc(C)cc3)n2-n2cccc2)c1	0.0563
3	F6519-5936	Cc1cccc(CS(=O)(=O)NCC(c2ccco2)n2cccn2)c1	0
4	F2685-0280	Cc1ccc(NC(=O)CSc2nc(=O)n(CCCN(C)C)c3c2CCC3)cc1Cl	392
5	F6496-3857	O=C(CCC(=O)N1CCC(Cn2nc(-c3ccc(F)cc3)ccc2=O)CC1)c1ccccc1	22962
6	F0566-0396	Cc1cccc2s/c(=N\C(=O)c3ccc(S(=O)(=O)N4CCCCC4)cc3)n(C)c12	24
7	F0651-0161	Cc1cc2cc(CNC(=O)c3ccc(OC(C)C)cc3)ccc2n1C	5931
8	F3398-2247	CSc1ccc(-c2noc(-c3cn(-c4ccc(Cl)cc4)c(=O)c4ccccc34)n2)cc1	26.7
9	F1872-0356	COc1ccc(-n2ccnc2SCC(=O)NC2CCCC2)c(OC)c1	2.12
10	F2633-0230	COc1ccccc1NC(=O)c1c(N)c(C(=O)c2ccc(C)cc2)n2ccccc12	111
11	F6679-0008	O=C(Cn1cnc2ccccc2c1=O)N1CC(n2c(C3CC3)nc3ccccc32)C1	15427
12	F0750-0169	COc1cccc(/C=C2/SC(=S)N(CCCC(=O)Nc3ccc(O)cc3)C2=O)c1	0.103
13	F0837-0557	COc1cccc(-c2csc(/C(C#N)=C\Nc3ccc(Br)cc3F)n2)c1	226
14	F6359-3804	Cc1ccc(OC2CCN(C(=O)Cc3ccccc3Cl)CC2)nn1	9.53
15	F3406-8422	O=c1n(Cc2ccccc2)nc2ccc(S(=O)(=O)N3CCSCC3)cn12	237
16	F6557-0563	O=S1(=O)CCN(S(=O)(=O)c2ccc(-n3cccn3)cc2)CCC1c1cccs1	2093
17	F2806-0052	O=C(Nc1ccc2ncsc2c1)c1ccc(S(=O)(=O)N2CCc3ccccc3C2)cc1	4.18
18	F2714-0416	COc1ccc(Cc2nnc(SCC(=O)Nc3cc(Cl)ccc3OC)[nH]c2=O)cc1	28926
19	F6478-3127	Cc1nccc(OC2CCN(C(=O)CCSc3ccccc3)C2)n1	3768
